# Supplementary material for: The chimeric TAC receptor co-opts the T cell receptor yielding robust anti-tumor activity without toxicity
Source: Nat Commun. 2018 Aug 3;9:3049. doi: 10.1038/s41467-018-05395-y (PMC6076291; doi:10.1038/s41467-018-05395-y)
Supplement: Supplementary file 1 — Supplementary Information [file 41467_2018_5395_MOESM1_ESM.pdf]

1 The chimeric TAC receptor co-opts the T cell receptor yielding robust anti-tumor activity  
2 without toxicity

3

4

5

**Helsen et al.**

Supplementary Figures

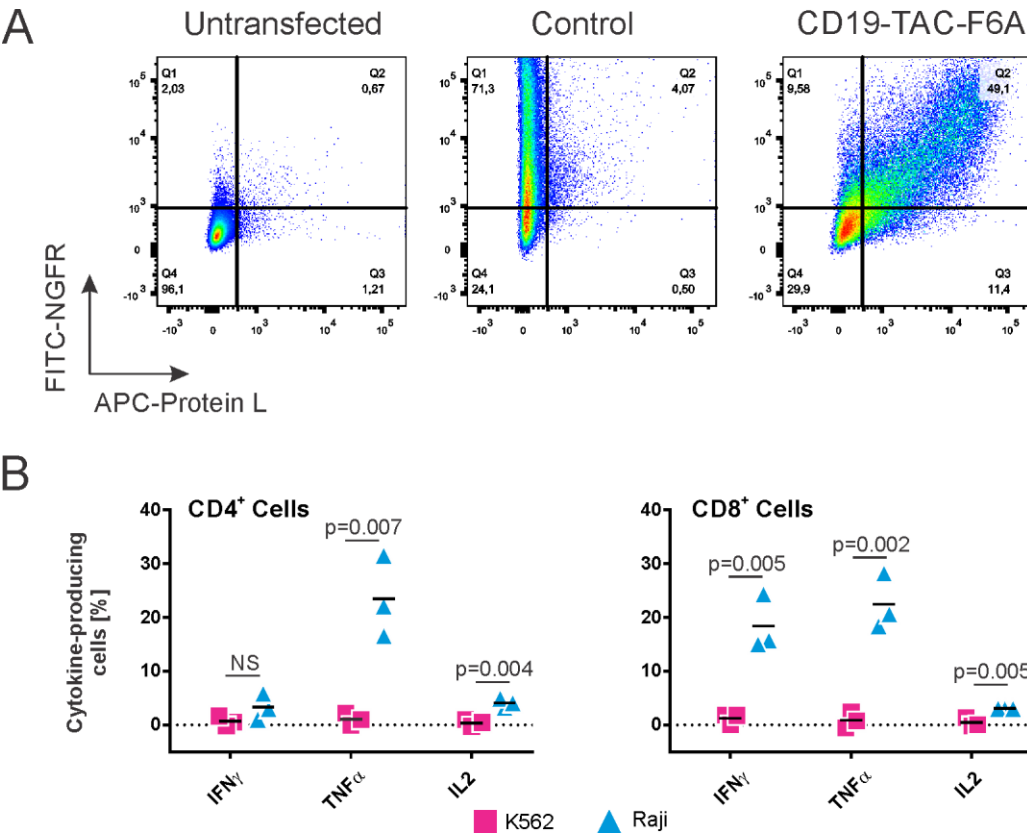

Supplementary Figure 1:

**F6A scFv TAC can be detected by Protein L and F6A TAC engineered T cells show antigen specific reactivity.** **A.** Protein L binds the kappa light chain of scFv. HEK 293T cells were transfected with CD19-TAC-F6A, stained and analyzed for TAC and tNGFR expression by flow cytometry. For the gating strategy see Supplementary Fig. 16. **B.** CD19-TAC-cells were stimulated with antigen-positive Raji (triangle) or antigen-negative K562 (square) tumor cells, respectively. Data are presented as percent of CD4 or CD8 T cells producing cytokine. Lines represent data medians. Multiple t-test was used to determine significance. For the gating strategy see Supplementary Fig. 13B.

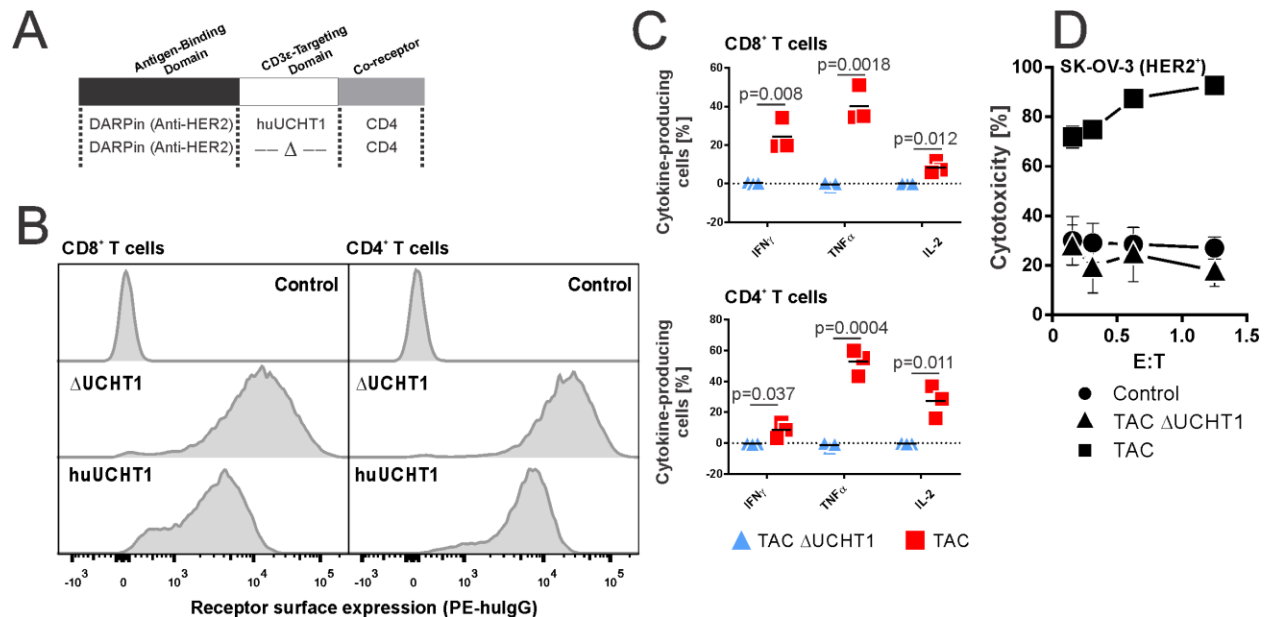

Supplementary Figure 2:

**CD3-binding domain is required for TAC-engineered T cell function.** Full-length and  $\Delta$ UCHT1 TAC receptors (**A**) were expressed on the surface of primary human T cells (**B**). Relative TAC surface expression is measured by flow cytometry. Cells were stained for CD4, CD8, tNGFR and TAC (via its Myc Tag), and gated on either CD4<sup>+</sup>NGFR<sup>+</sup> or CD8<sup>+</sup>NGFR<sup>+</sup>; representative TAC expression data are presented as histograms. For the gating strategy see Supplementary Fig. 13A. **C**. HER2-TAC-T cells (bearing huUCHT1 (square) or  $\Delta$ UCHT1 (triangle)) are stimulated with antigen-positive SK-OV-3 tumor cells. Data are presented as percent of CD4<sup>+</sup> or CD8<sup>+</sup> T cells producing cytokine. Lines represent data means. Multiple t-test was used to determine significance. For the gating strategy see Supplementary Fig. 13B. **D**. HER2-TAC-T cells (bearing huUCHT1 (square) or  $\Delta$ UCHT1 (triangle)) and vector control T cells (circles) are co-cultured with SK-OV-3 tumor cells to measure TAC-T cell-mediated cytotoxicity. Data are from 3 independent experiments with 3 different donors; error bars show standard deviation.

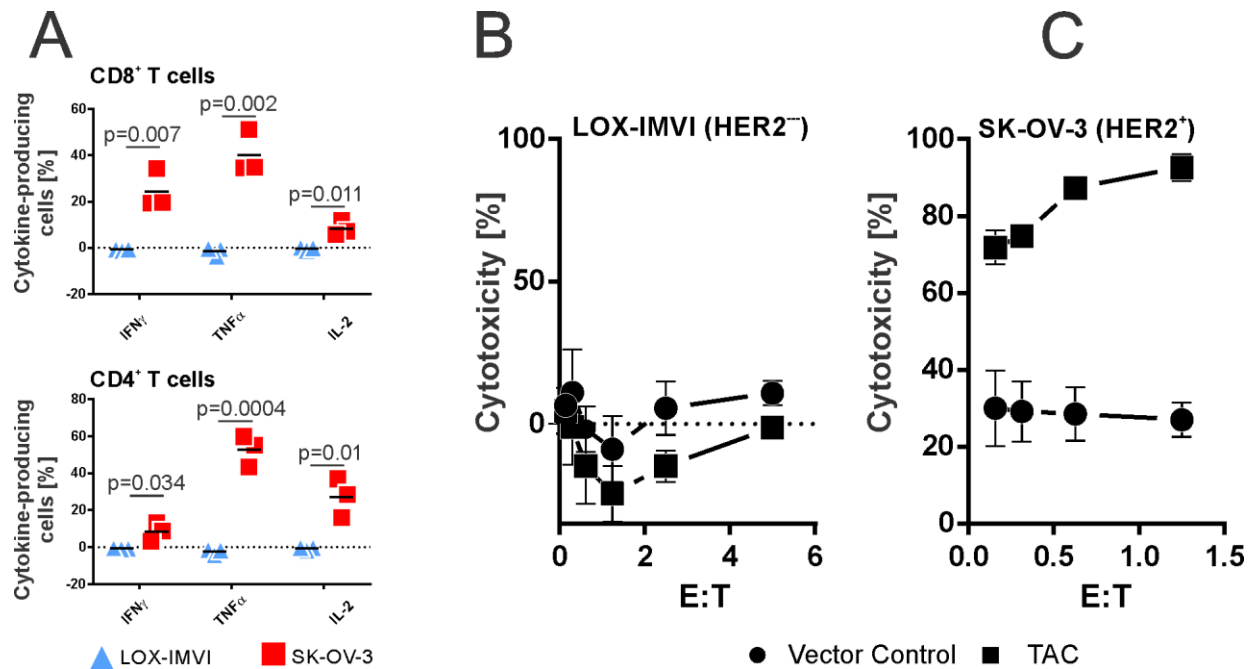

Supplementary Figure 3:

**TAC-T cells show no evidence of auto-activation in the absence of target antigen.** Data originates from the same experiment as Supplemental Figure 2. **A.** HER2-TAC-T cells are stimulated with antigen-positive SK-OV-3 (square) or antigen-negative LOX-IMVI (triangle) tumor cells. Data are presented as percent of CD4<sup>+</sup> or CD8<sup>+</sup> T cells producing cytokine. Lines represent data means. Multiple t-test was used to determine significance. For the gating strategy see Supplementary Fig. 13B. **B-C.** HER2-TAC-T cells (bearing UCHT1; square) and vector control T cells (circle) are co-cultured with LOX-IMVI or SK-OV-3 tumor cells to measure TAC-T cell-mediated cytotoxicity. Data are from 3 independent experiments with 3 different donors; error bars show standard deviation.

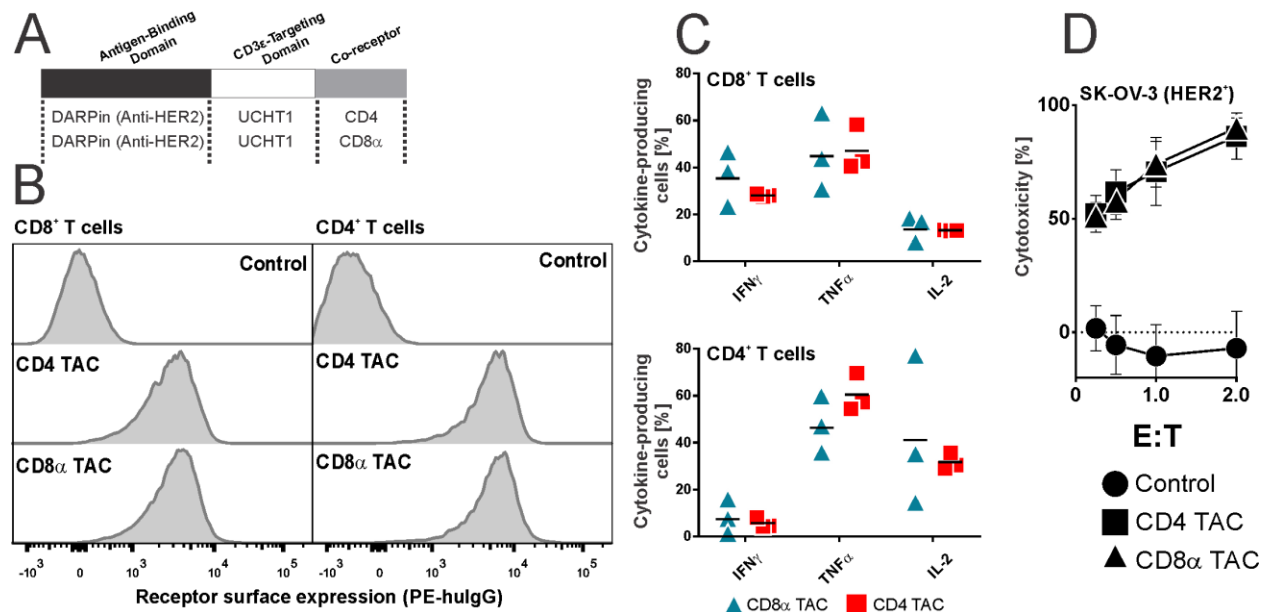

Supplementary Figure 4:

**Evaluation of cytosolic TAC domains.** **A.** Schematic representation of CD4 and CD8 $\alpha$  TAC constructs containing the anti-HER2 DARPin and UCHT1 CD3-binding domain. **B.** Cells were stained for CD4, CD8, tNGFR, and TAC expression, and gated on either CD4 $^{+}$ NGFR $^{+}$  or CD8 $^{+}$ NGFR $^{+}$ ; representative TAC expression data are presented as histograms. For the gating strategy see Supplementary Fig. 13A. **C.** Cytokine production by CD4 TAC- (square) and CD8 $\alpha$  TAC- (triangle) T cells stimulated by HER2 $^{+}$  SK-OV-3 tumor cells are shown. Lines represent data means. Multiple t-test was used to determine significance. For the gating strategy see Supplementary Fig. 13B. **D.** Cytotoxicity was measured by co-culturing HER2 $^{+}$  SK-OV-3 tumor cells with TAC- (CD4 co-receptor (squares) or CD8 $\alpha$  co-receptor (triangles)) or vector control (circles) T cells. Data are from 3 independent experiments with 3 different donors; error bars show standard deviation.

A

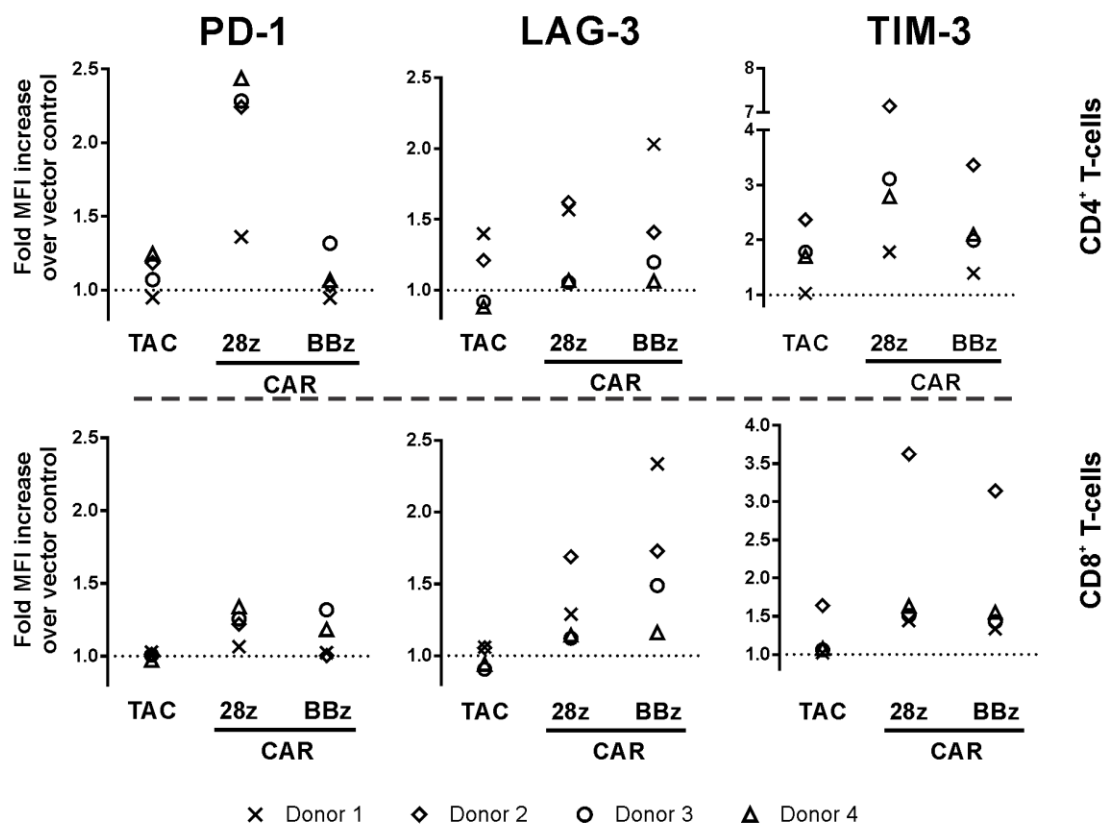

B

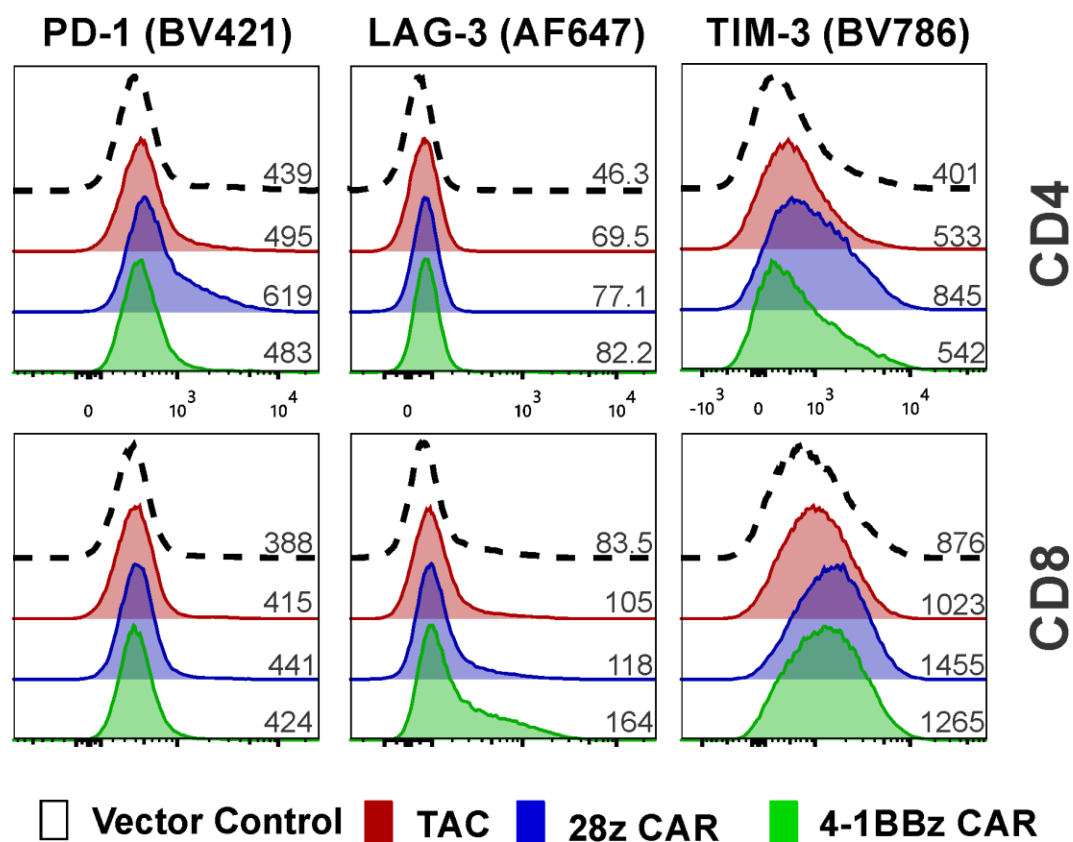

Supplementary Figure 5:

**Relative expression of checkpoint receptors in CAR- and TAC-engineered T cells.** T cells are transduced with HER2-TAC, anti-HER2 28ζ CAR or anti-HER2 BBζ CAR, stained for surface marker expression, and analyzed by flow cytometry. **A.** Expression of checkpoint receptors PD-1, LAG-3 and TIM-3. Populations are gated on either CD4<sup>+</sup>NGFR<sup>+</sup> or CD8<sup>+</sup>NGFR<sup>+</sup>. All data are normalized to vector control (vector only carrying tNGFR). Data is derived from 4 individual donors across two separate experiments. Each donor is represented by a unique symbol to visualize donor-to-donor variations. **B.** Representative histograms of HER2-TAC (red), anti-HER2 28ζ CAR (blue) or anti-HER2 BBζ CAR (green). Populations are gated on either CD4<sup>+</sup>NGFR<sup>+</sup> or CD8<sup>+</sup>NGFR<sup>+</sup>. Representative, normalized histograms per marker are shown. Values shown indicate mean fluorescence intensity. For both A and B the gating strategy is shown in Supplementary Fig. 14.

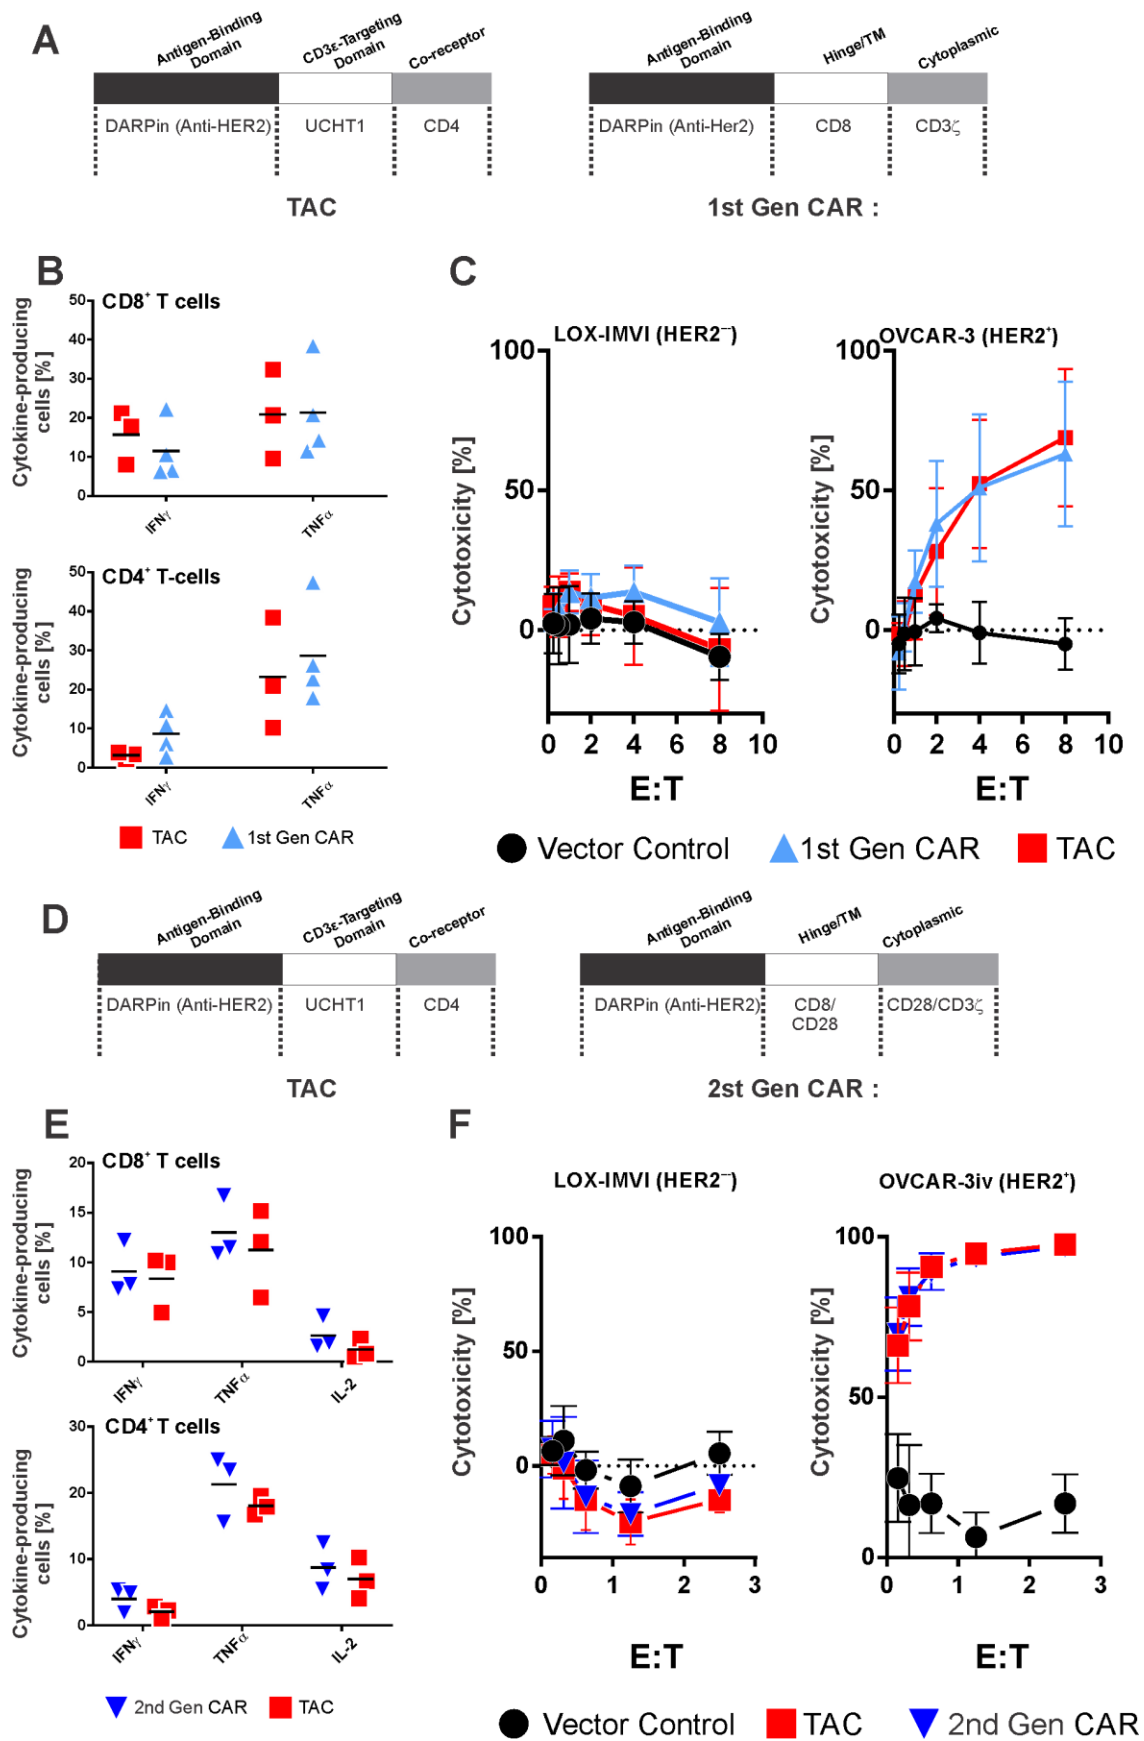

Supplementary Figure 6:

**First-generation CAR-, second-generation CAR-, and TAC-T cells exhibit similar *in vitro***

**potency. A.** Schematics of TAC and first-generation CAR constructs. **B.** Comparison of cytokine

production from CD4<sup>+</sup> or CD8<sup>+</sup> TAC- (square) and first-generation CAR- (triangle) T cells when

stimulated with HER2<sup>+</sup> OVCAR-3 tumor cells (minus cytokine production triggered by HER2<sup>-</sup>

LOX-IMVI tumor cells). Lines represent data means. **C.** Cytotoxicity of TAC- (square) and first-

generation CAR- (triangle) relative to vector control (circle) T cells against OVCAR-3 and

LOX-IMVI tumor cells. Data are from 3-4 independent experiments; error bars show standard

error of the mean. **D.** Schematics of the TAC and second-generation CD28-based CAR

constructs. **E.** Comparison of cytokine production from CD4<sup>+</sup> or CD8<sup>+</sup> TAC- (square) and

second-generation CAR- (inverted triangle) T cells when stimulated with OVCAR-3 (minus

cytokine production triggered by HER2<sup>-</sup> LOX-IMVI tumor cells). Lines represent data means. **F.**

Cytotoxicity of TAC- (square) and second-generation CD28-based CAR- (inverted triangle)

relative to vector control (circle) T cells against LOX-IMVI and OVCAR-3 tumor cells. Data are

from 3 independent experiments; error bars show standard error of the mean. For B and E the

gating strategy is shown in Supplementary Fig. 13B.

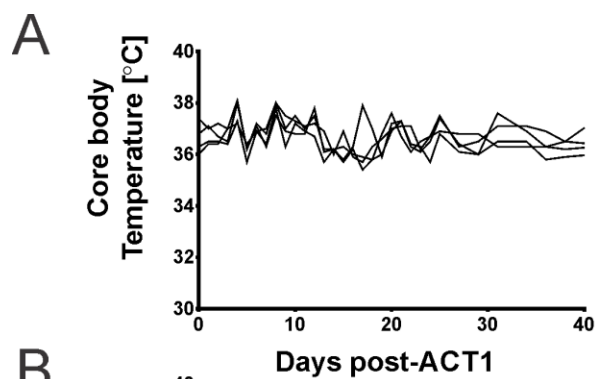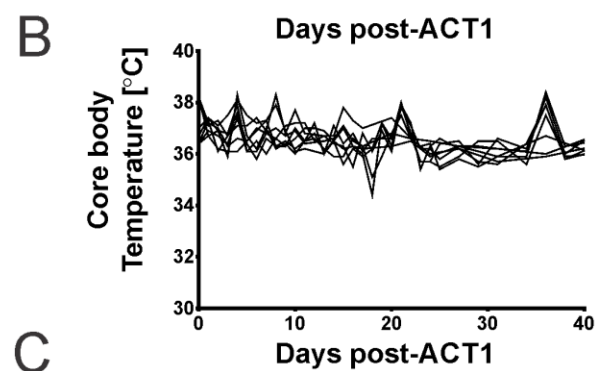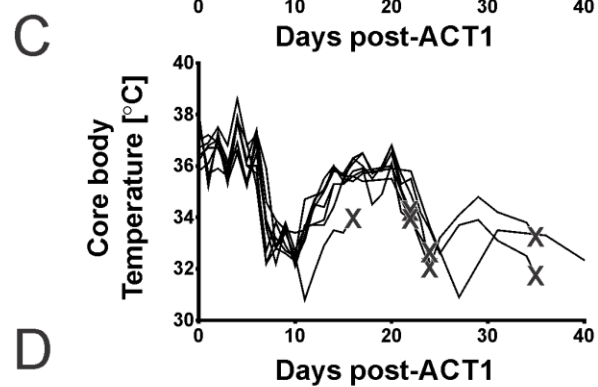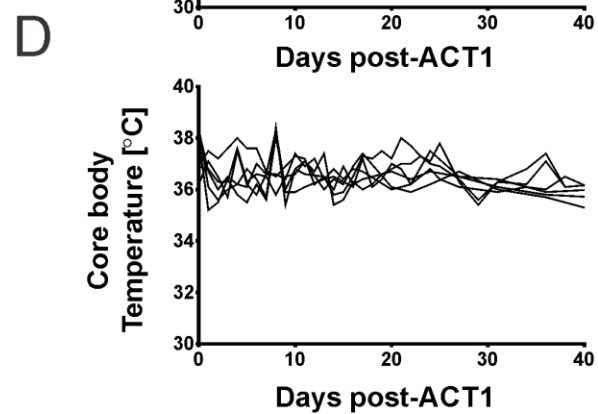

TAC

1st Gen CAR

2nd Gen CAR

Vector Control

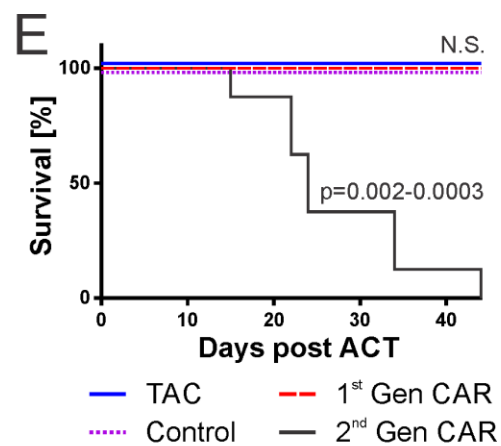

Supplementary Figure 7:

**HER2-TAC-T cells demonstrate an enhanced safety profile over first- and second-generation HER2-CAR-T cells *in vivo*.** OVCAR-3 tumor-bearing mice are treated with  $2.0 \times 10^6$  HER2-TAC-T cells (**A**), first-generation anti-HER2 CAR-T cells (**B**), second-generation anti-HER2 28 $\zeta$  CAR-T cells (**C**), or a matched total number of vector control T cells (**D**). Mice are followed for change in core body temperature; each curve displays data from a single treated mouse. When mice reach a toxicity-induced endpoint, this is indicated via an X. Data has been replicated in an additional independent experiment. The change in core body temperature between vector control, 1<sup>st</sup> gen CAR, and TAC was not significantly different. Significance was determined via curve fitting and multiple t-test. Survival is shown in (**E**). Vector control (purple, dotted), TAC (blue, solid) or first-generation CAR (red, dashes) treated mice showed no toxicity-induced endpoints and were not significantly different. In contrast, second-generation 28 $\zeta$  CAR (black, solid)-treated mice all reached toxicity-induced endpoint within 44 days. Mice were not followed to tumor volume endpoint. Significance was determined via the Log Rank test.

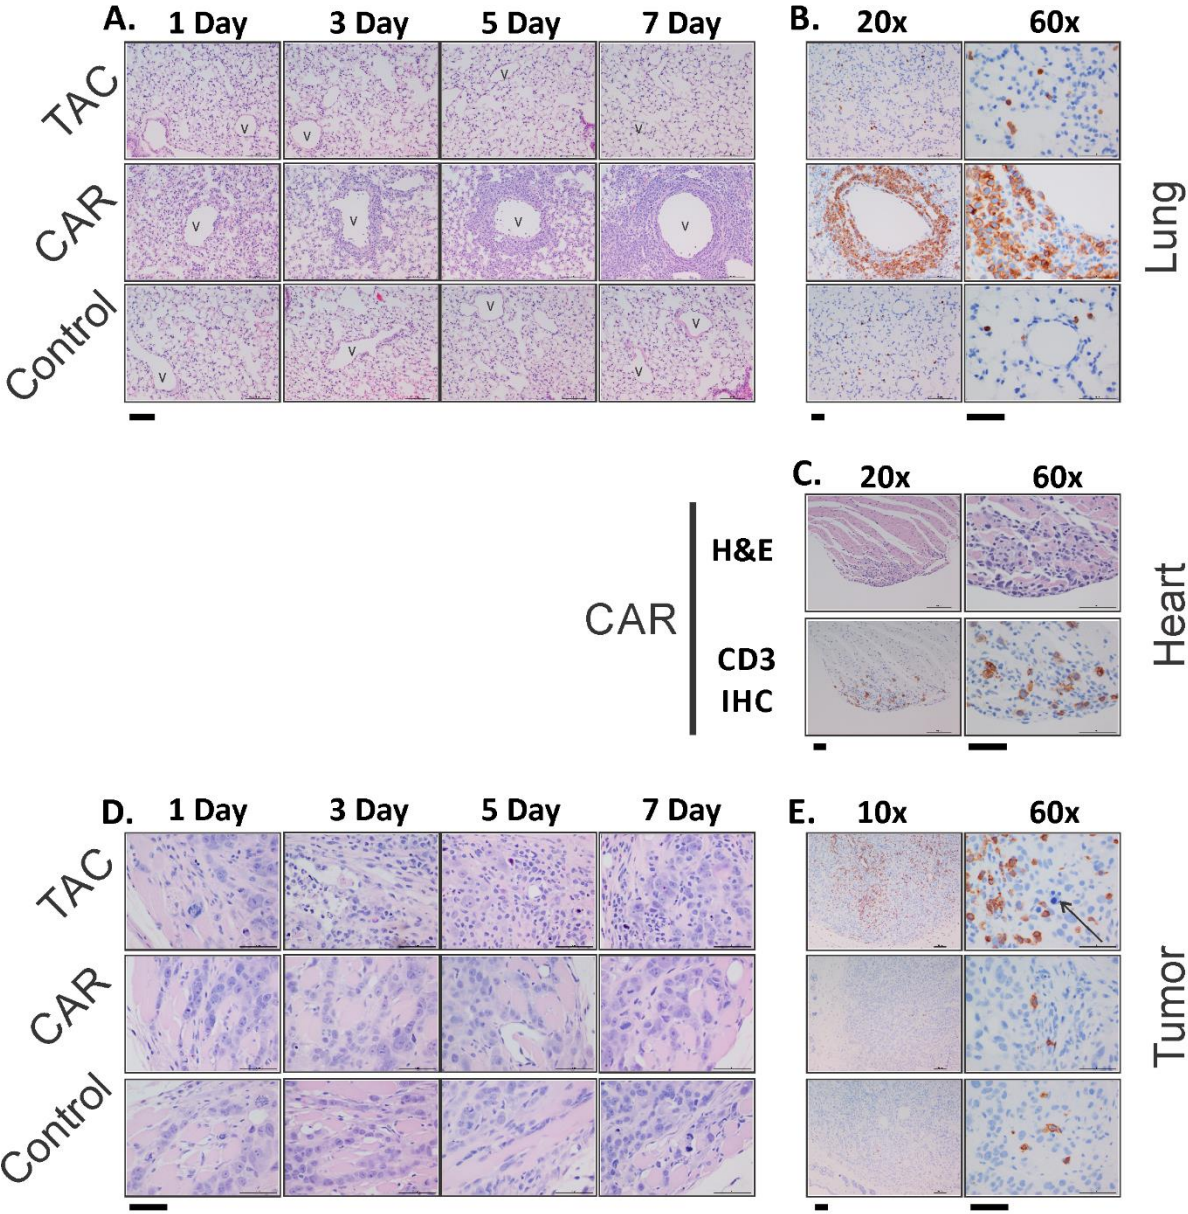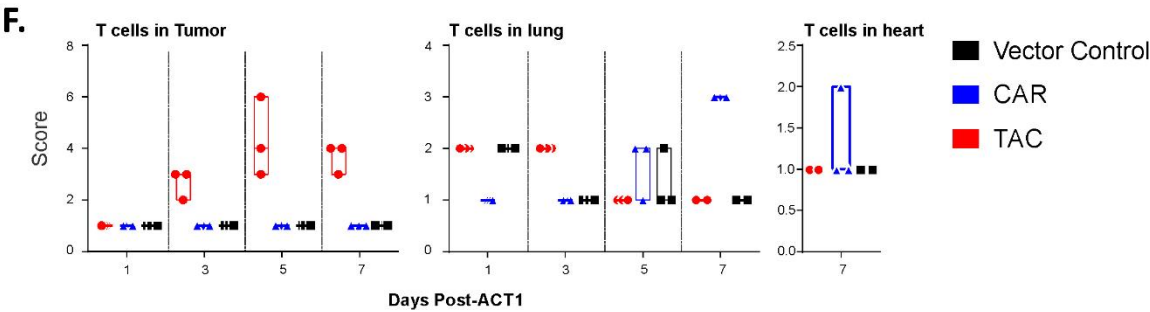

Supplementary Figure 8:

**TAC- and CAR-T cells show differential patterns of localization *in vivo*.** OVCAR-3 tumor-bearing mice were treated with  $6.0 \times 10^6$  second-generation anti-HER2 28 $\zeta$  CAR- or HER2-TAC-T cells, or a matched total number of vector control T cells. At 1, 3, 5, and 7 days post-ACT1 mice (n = 3 per treatment) were perfused and tissues were formalin fixed and paraffin embedded. **A.** Timecourse of H&E (hematoxylin and eosin) stained lung sections at 20X magnification; vasculature is indicated by a “v”. Scale bar indicates 100  $\mu$ m. **B.** CD3 IHC staining of lung sections at 7 days post-ACT1. Scale bar indicates 50  $\mu$ m. **C.** H&E and CD3 IHC of cardiac tissue at 7 days post-ACT1. Scale bar indicates 50  $\mu$ m. **D.** Timecourse of H&E stained tumor sections at 60X magnification. Scale bar indicates 50  $\mu$ m. **E.** CD3 IHC staining of tumor sections at 7 days post-ACT1; arrow indicates a necrotic tumor cell. Scale bar indicates 50  $\mu$ m. In all cases, images are representative of observations in all mice (n = 3 each). **F.** CD3 IHC was performed on heart, lung, and tumor tissue; T cell infiltrate was scored as % infiltrate based on tissue area in 10% intervals (score 1 = <1%, score 2 = 1-10%, score 3 = 10-20%, score 4 = 20-30%, score 5 = 30-40%, and score 6 = 40-50%). Data presented as an average score for n = 3 mice per time point.

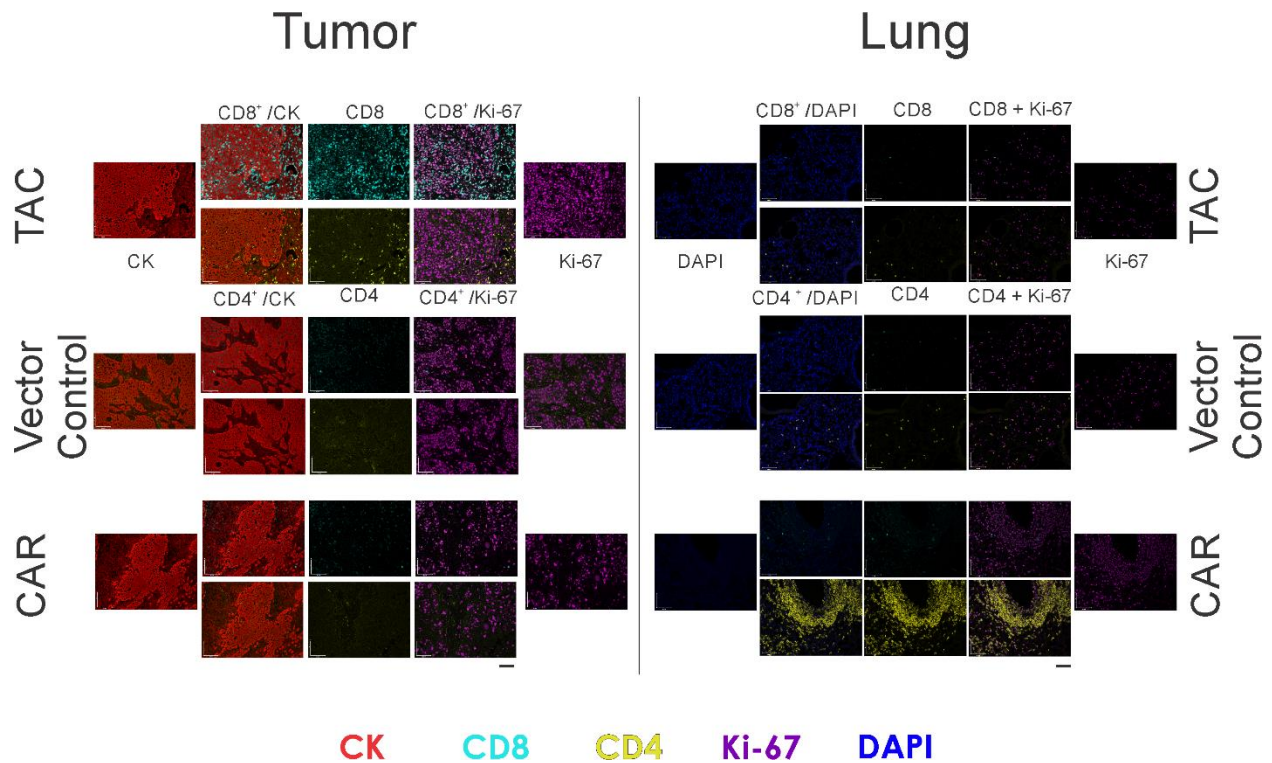

Supplementary Figure 9:

**Single color and composite multicolor IHC tissue analysis.** OVCAR-3 tumor-bearing mice were treated with  $6.0 \times 10^6$  second-generation anti-HER2 28ζ CAR- or HER2-TAC-T cells, or a matched total number of vector control T cells. At 7 days post-ACT1 mice ( $n = 3$  per treatment) were perfused and tissues were formalin fixed and paraffin embedded for subsequent multicolor IHC analysis (tumor or lung tissues were stained for human cytokeratin (CK, red), cellular proliferation marker Ki-67 (purple), CD8 (cyan), CD4 (yellow), and DAPI (blue)). Representative single-color images are shown alongside 2-color overlay images. Scale bar indicates 100 μm.

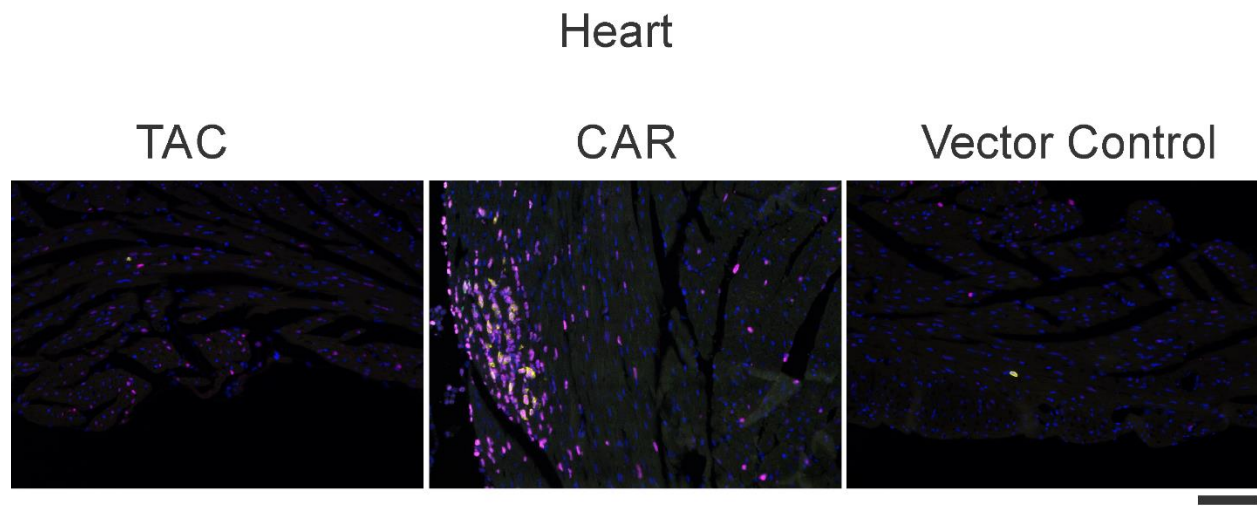

CD8      CD4      Ki-67      DAPI

Supplementary Figure 10:

**Multicolor IHC of cardiac tissue at 7 days post-ACT1.** OVCAR-3 tumor bearing mice were treated with  $6.0 \times 10^6$  second-generation anti-HER2 28 $\zeta$  CAR- or HER2-TAC-T cells, or a matched total number of vector control T cells. At 7 days post-ACT1 mice (n = 3 per treatment) were perfused and tissues were formalin fixed and paraffin embedded for subsequent multicolor IHC analysis (cardiac tissue was stained for cellular proliferation marker Ki-67 (purple), CD8 (cyan), CD4 (yellow), and DAPI (blue)). Scale bar indicates 100  $\mu$ m. Representative images are shown.

A

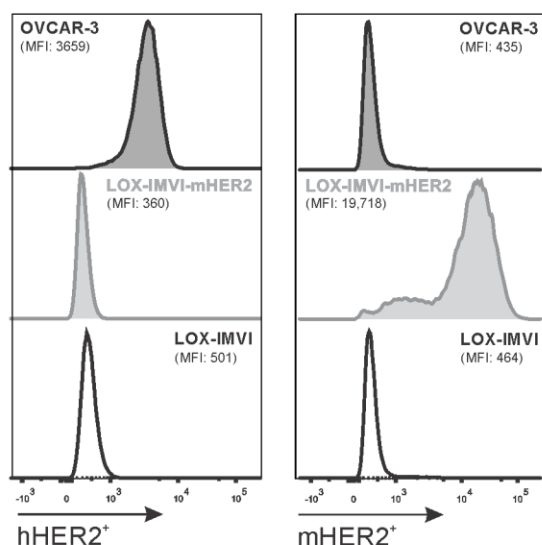

B

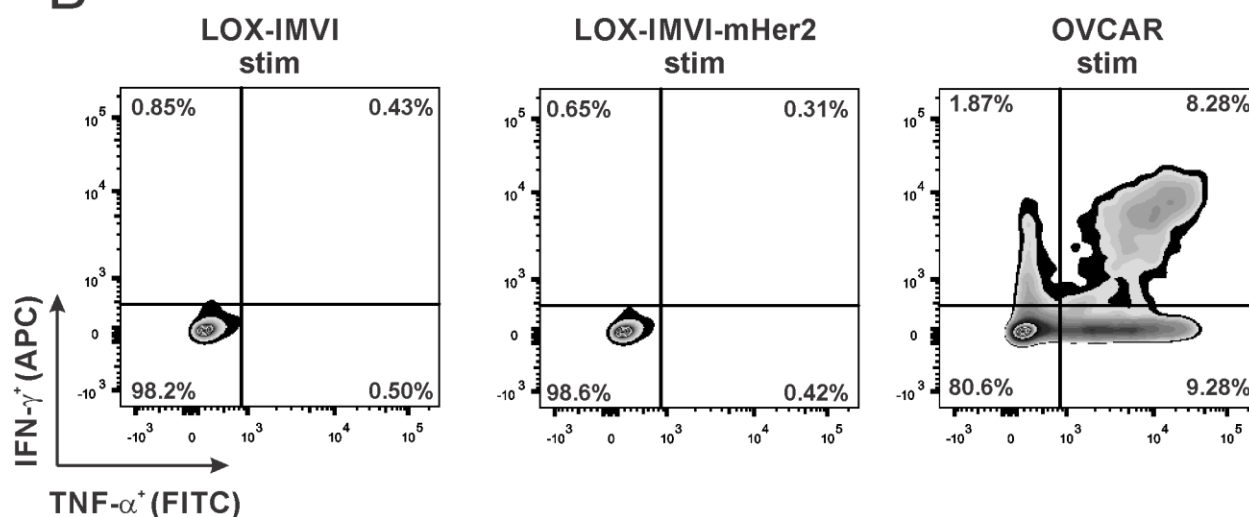

Supplementary Figure 11.

**Second generation anti-HER2 28 $\zeta$  CAR-T cells do not respond to murine HER2. A.**

Expression of human or murine HER2 (hHER2 or mHER2, respectively) on OVCAR-3, LOX-IMVI, and LOX-IMVI-mHER2 tumor cell lines as determined by flow cytometry. For the gating strategy see Supplementary Fig. 16. **B.** Production of activation cytokines (IFN- $\gamma$  and TNF- $\alpha$ ) by CD8<sup>+</sup> CD28 $\zeta$ -CAR T cells after stimulation with tumor cell lines (as indicated) was determined by flow cytometry. Data is representative of findings from two independent experiments. For the gating strategy see Supplementary Fig. 13B.

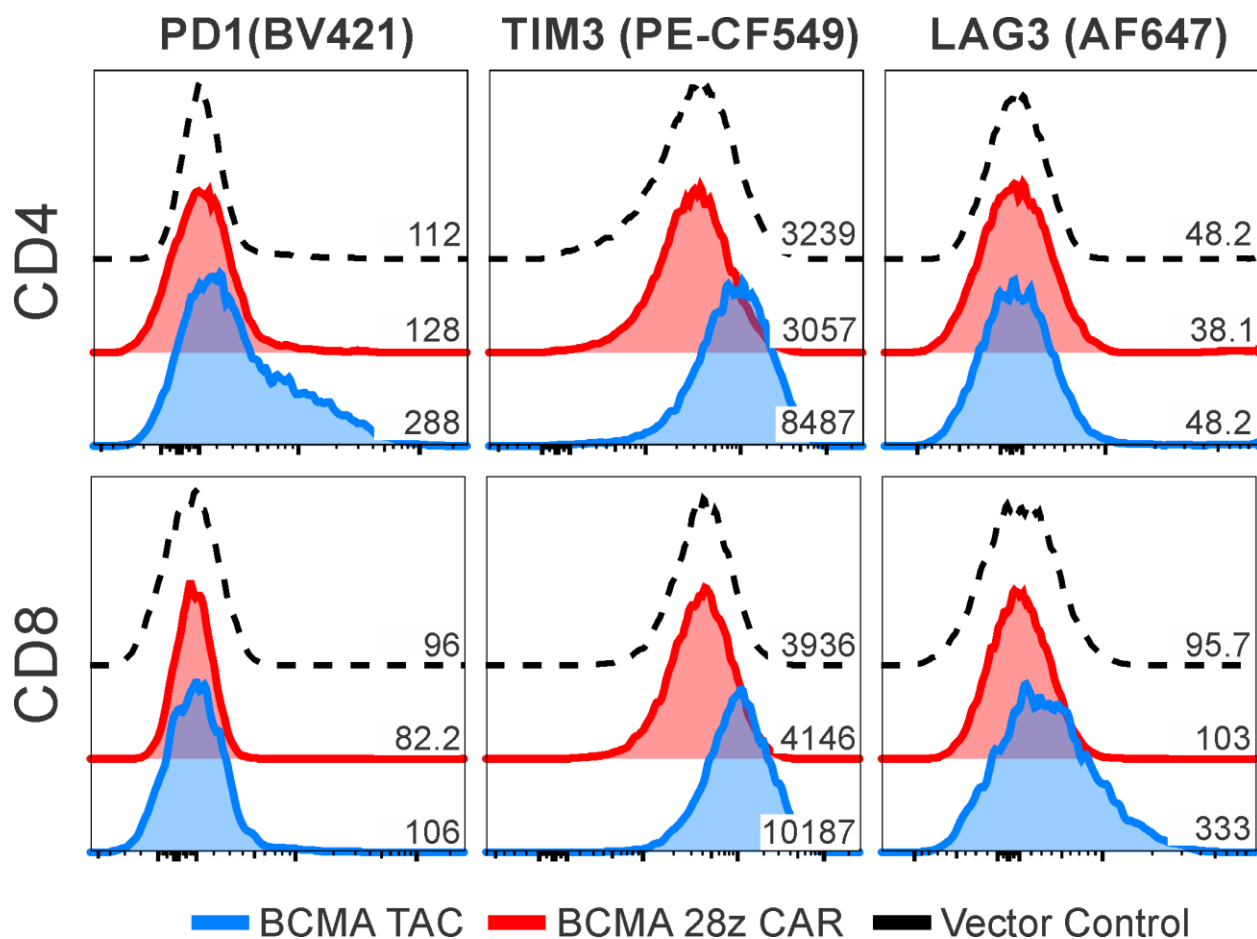

Supplementary Figure 12:

**Relative expression of checkpoint receptors in BCMA-CAR- and TAC-engineered T cells.**

T cells were transduced with BCMA-TAC, second-generation BCMA-CD28 $\zeta$ -CAR, or vector control (tNGFR). Engineered T cells are stained for surface marker expression and analyzed by flow cytometry. Populations are gated on CD4<sup>+</sup>NGFR<sup>+</sup> or CD8<sup>+</sup>NGFR<sup>+</sup> analysis. Values indicate MFI of each marker. Histograms are from one donor, representative of three donors from three independent experiments. For the gating strategy see Supplementary Fig. 14

A

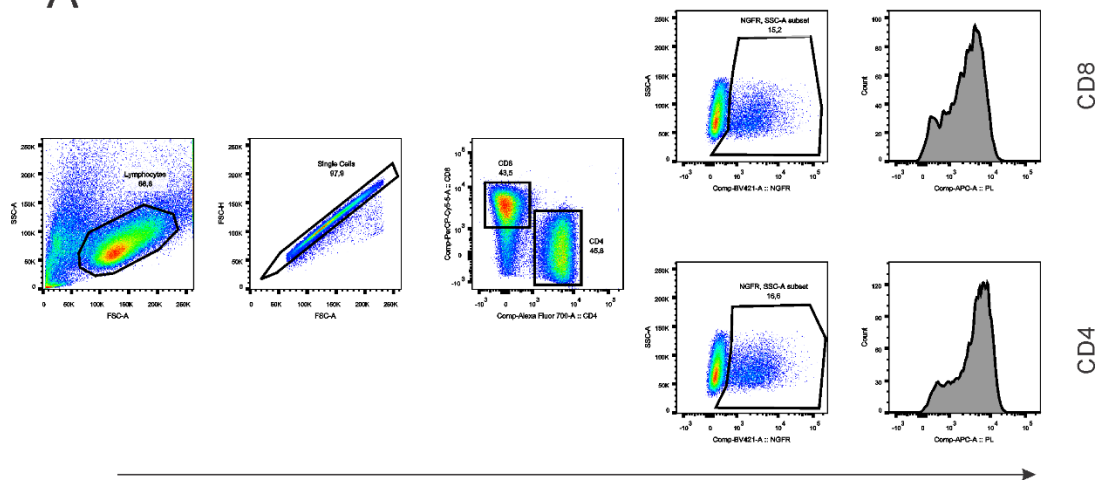

B

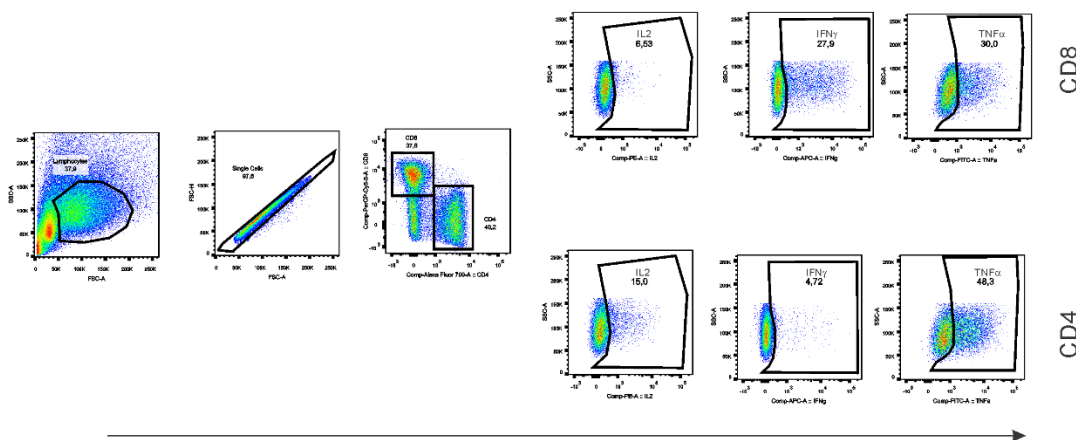

Supplementary Figure 13:

**Examples of gating strategies used for the analysis of flow cytometry data. A.** Gating strategy for phenotypic analysis of engineered T cells. Lymphocytes (SSC-A v. FSC-A) → singlets (FSC-H v. FSC-A) → CD8<sup>+</sup> or CD4<sup>+</sup> cells (CD8-PerCPCy5.5 v. CD4-AF700) → NGFR<sup>+</sup> cells (SSC-A v. NGFR-BV421) → TAC receptor expression as a histogram (Protein L<sup>+</sup> with indirect detection via APC-conjugated streptavidin is shown as an example). NGFR<sup>+</sup> gates were set based on fully stained, non-transduced T cell controls. **B.** Gating strategy for functional cytokine production by tumor cell line-stimulated engineered T cells. Lymphocytes (SSC-A v. FSC-A) → singlets (FSC-H v. FSC-A) → CD8<sup>+</sup> or CD4<sup>+</sup> cells (CD8-PerCPCy5.5 v. CD4-AF700) → cytokine positive (SSC-A v. TNF-α-FITC or IFN-γ-APC or IL-2-PE). Cytokine<sup>+</sup> gates were set based on fully stained, PBS- or antigen-negative tumor cell line-stimulated controls.

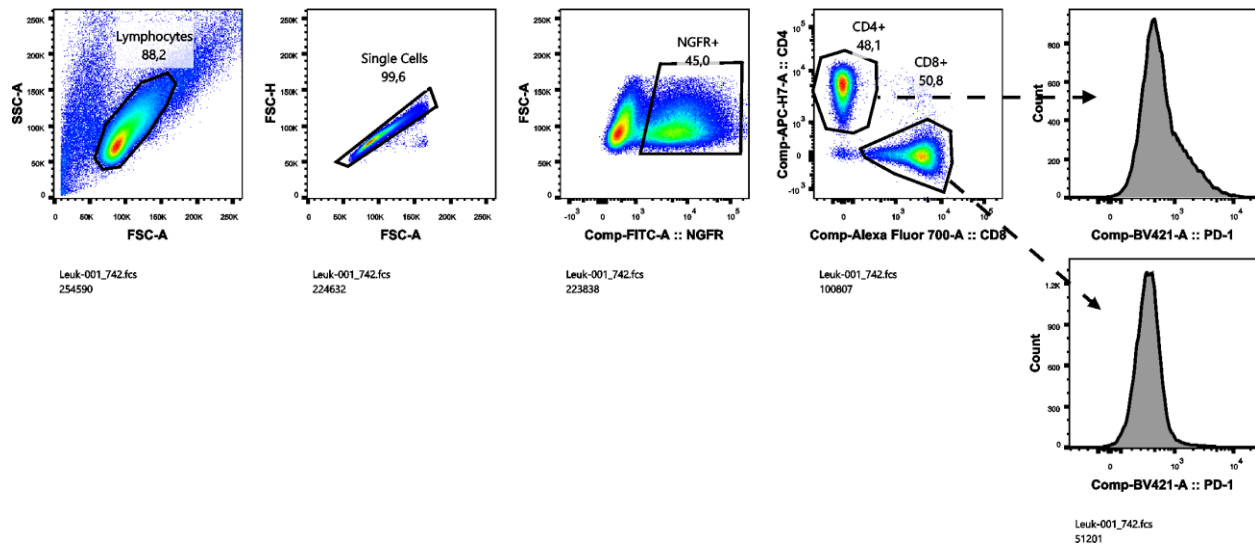

Supplementary Figure 14:

**Examples of gating strategies used for the analysis of flow cytometry data.** Gating strategy for checkpoint analysis of engineered T cells. Lymphocytes (SSC-A v. FSC-A) → singlets (FSC-H v. FSC-A) → NGFR<sup>+</sup> cells (SSC-A v. NGFR- VioBright FITC) → CD8<sup>+</sup> or CD4<sup>+</sup> cells (CD8-AF700 v. CD4-APC-H7-A) → Checkpoint receptor expression as a histogram (TIM-3-BV785/ LAG-3-AF647/ PD-1-BV421). NGFR<sup>+</sup> gates were set based on fully stained, vector control transduced T cells.

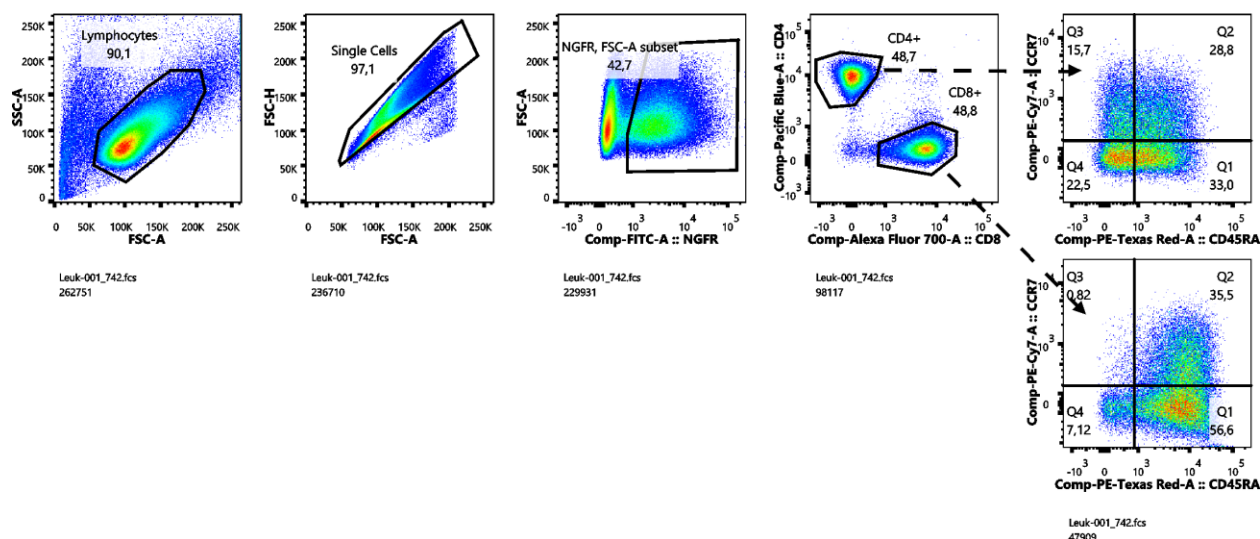

Supplementary Figure 15:

**Examples of gating strategies used for the analysis of flow cytometry data.** Gating strategy for memory population analysis of engineered T cells. Lymphocytes (SSC-A v. FSC-A) → singlets (FSC-H v. FSC-A) → NGFR<sup>+</sup> cells (SSC-A v. NGFR- VioBright FITC) → CD8<sup>+</sup> or CD4<sup>+</sup> cells (CD8-AF700 v. CD4- Pacific Blue) → Checkpoint receptor expression was analysed via quarter analysis (CD27-APC-H7/ CD28-PE/ CD45RA-ECD/ CCR7-PE-Cy7). NGFR<sup>+</sup> gates were set based on fully stained, vector control transduced T cells.

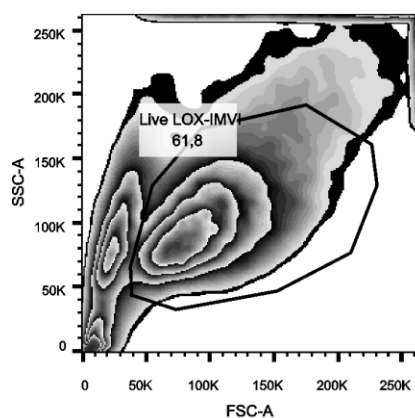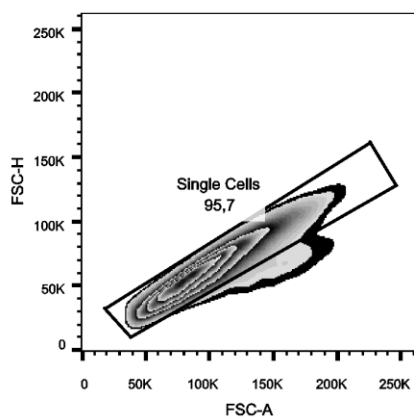

Histogram  
or  
Quadrant  
analysis

Supplementary Figure 16:

**Examples of gating strategies used for the analysis of flow cytometry data.** Gating strategy for various adherent cell lines engineered with various surface expressing proteins. Cell gate (SSC-A v. FSC-A) → singlets (FSC-H v. FSC-A) → Quadrant or Histogram analysis with relevant markers

## Test for significance in cytokine levels

|       | Condi-<br>tions | GM-CSF   | IFN $\gamma$ | IL-1 $\beta$ | IL-2     | IL-4     | IL-6 | IL-8    | IL-10   | IL-12<br>(p70) | MCP-1 | TNF $\alpha$ | IL-13   | IL-5     |
|-------|-----------------|----------|--------------|--------------|----------|----------|------|---------|---------|----------------|-------|--------------|---------|----------|
|       |                 |          |              |              |          |          |      |         |         |                |       |              |         |          |
| Day 3 | TAC-<br>Vector  | NS       | NS           | NS           | NS       | NS       | NS   | NS      | NS      | NS             | N/A   | NS           | NS      | NS       |
|       | TAC-<br>CAR     | 0.00068  | 0.00051      | NS           | < 0.0001 | < 0.0001 | NS   | NS      | 0.00101 | NS             | N/A   | 0.0036       | 0.00239 | NS       |
|       | CAR-<br>Vector  | 0.00013  | 0.00021      | NS           | < 0.0001 | < 0.0001 | NS   | NS      | 0.0009  | NS             | N/A   | 0.00254      | 0.00052 | NS       |
|       |                 |          |              |              |          |          |      |         |         |                |       |              |         |          |
| Day 7 | TAC-<br>Vector  | NS       | NS           | N/A          | NS       | NS       | NS   | NS      | NS      | NS             | NS    | 0.00093      | NS      | NS       |
|       | TAC-<br>CAR     | < 0.0001 | 0.00035      | N/A          | 0.00038  | 0.00522  | NS   | 0.00296 | 0.00061 | 0.00652        | NS    | NS           | 0.00025 | < 0.0001 |
|       | CAR-<br>Vector  | < 0.0001 | 0.00035      | N/A          | 0.00035  | 0.00523  | NS   | 0.00325 | 0.00063 | 0.00867        | NS    | NS           | 0.00025 | < 0.0001 |
|       |                 |          |              |              |          |          |      |         |         |                |       |              |         |          |

Supplementary Table 1:

**Statistical analysis of serum cytokine data.** An unpaired t-test was used to evaluate the statistical significance of the serum cytokine data (n = 3 for each of HER2-TAC-, HER2-CAR-, and vector control T cells) presented in Figure 6. Pairwise comparisons between the three treatment groups are presented for each of the thirteen cytokines tested. P-values are shown. NS = not significant using a confidence interval of 95%. N/A denotes cases where no analysis was mathematically possible.

252

|       |                                              |
|-------|----------------------------------------------|
| FWD-1 | GGCGCGCCATGGATTTCAGGTCCAGATTTTC              |
| REV-1 | CCCGGGGTTTCAGGTCTTCTTCGCTAATC                |
| FWD-2 | ATATGGCGCGCCATGGATTTC                        |
| REV-2 | GCTGAACTTCACTCTGCAGTAAAGGGTGATAACCAG         |
| FWD-3 | ATCACCTTTACTGCAGAGTGAAGTTCAGCAGGAG           |
| REV-3 | ATATGCTAGCTTAGCGAGGGGG                       |
| FWD-4 | ATATGGATCCGTGGGGTCACCGTCTCCTCAACC            |
| REV-4 | ATATGCTAGCTTAGCGAGGGGGCAGGGC                 |
| FWD-5 | CATGTGACTCCACGGAGTACCGG                      |
| REV-5 | GTCCGAACGTCCACGGCAGAG                        |
| FDW-6 | GGTCTTCTTCGCTAATCAGTTTCTGTTCCGGCCTGGCGGCGTGG |
| REV-6 | CCACGCCGCCAGGCCGGAACAGAACTGATTAGCGAAGAAGACC  |

253

254 Supplementary Table 2:  
 255 Sequence of oligos used in construction of various plasmid constructs described in materials and  
 256 methods.
